# Supplementary material for: Bridged and fused triazolic energetic frameworks with an azo building block towards thermally stable and applicable propellant ingredients
Source: Royal Society of Chemistry journal article supplement (doi:10.1039/d1ta07520a), 2021-01-01
Supplement: d1ta07520a1.pdf [file d1ta07520a1.pdf]

## Electronic Supplementary Information

### Bridged and Fused Triazolic Energetic Frameworks with an Azo Building Block towards Thermally Stable and Applicable Propellant

#### Ingredients

Qiong Yu,<sup>‡a</sup> Fengsheng Li,<sup>‡b</sup> Ping Yin,<sup>\*b</sup> Siping Pang,<sup>\*b</sup> Richard J. Staples<sup>c</sup> and Jean'ne M. Shreeve<sup>\*a</sup>

<sup>a</sup> Dr. Q. Yu, Prof. Dr. J. M. Shreeve, Department of Chemistry, University of Idaho, Moscow, ID 83844-2343 (USA). Fax: (+1) 208-885-6173. E-mail: jshreeve@uidaho.edu

<sup>b</sup> F. Li, Prof. Dr. P. Yin, Prof. Dr. S. Pang, School of Materials Science & Engineering, Beijing Institute of Technology, Beijing 100081, (P. R. China), E-mail: pingyin@bit.edu.cn, pangsp@bit.edu.cn

<sup>c</sup> Dr. R. J. Staples, Department of Chemistry, Michigan State University, East Lansing, MI 48824 (USA).

<sup>‡</sup> **These authors contributed equally.**

|                                                                          |     |
|--------------------------------------------------------------------------|-----|
| Table of Contents .....                                                  | S1  |
| Experimental Section.....                                                | S2  |
| Theoretical calculations of <b>3 – 5</b> and <b>7 - 9</b> .....          | S4  |
| Crystallographic data of <b>3 – 5</b> .....                              | S5  |
| NMR and IR spectra and DSC plots for <b>2 – 5</b> and <b>7 - 9</b> ..... | S15 |
| References.....                                                          | S24 |

## Experimental Section

### Safety precautions

Although no explosions or hazards were observed during the preparation and handling of these compounds, all are potentially explosive materials. Mechanical actions involving scraping must be avoided. In addition, all compounds must be synthesized on a small scale. Manipulations must be carried out in a hood behind a safety shield. Eye protection and leather gloves must be worn at all times.

### General methods

Reagents were purchased from Aldrich and Acros Organics and were used as received.  $^1\text{H}$  and  $^{13}\text{C}$  NMR spectra were recorded on 300/400 MHz (Bruker AVANCE 300/400) nuclear magnetic resonance spectrometers operating at 300/400, and 75/100 MHz, respectively.  $\text{CD}_3\text{CN}$ ,  $\text{CDCl}_3$ , or  $d_6$ -DMSO were used as solvent and locking solvent. Chemical shifts for the  $^1\text{H}$  and  $^{13}\text{C}$  spectra are reported relative to  $\text{Me}_4\text{Si}$ . The decomposition (onset temperature) points were obtained on a differential scanning calorimeter (TA Instruments Co., model Q2000) at a heating rate of  $5\text{ }^\circ\text{C min}^{-1}$ . IR spectra were recorded using KBr pellets with a FTIR spectrometer (Thermo Nicolet AVATAR 370). Density was determined at room temperature by employing a Micromeritics AccuPyc II 1340 gas pycnometer. Elemental analyses (C, H, N) were performed on a Vario Micro cube Elementar Analyser. Impact and friction sensitivity measurements were made using a standard BAM fall hammer and a BAM friction tester.

Synthesis of (*E*)-1,1'-(diazene-1,2-diylbis(3-nitro-1*H*-1,2,4-triazole-5,1-diyl))bis(propan-2-one) (**2**):

Method A: 1-(5-amino-3-nitro-1*H*-1,2,4-triazol-1-yl)propan-2-one<sup>1</sup> (**1**) (0.185 g, 1.0 mmol) was dissolved in concentrated hydrochloric acid (2.5 mL). Potassium permanganate (0.197 g, 1.2 mmol) was dissolved in water (2.5 mL) and added dropwise to the reaction mixture. It was stirred for 48 hours at room temperature. The precipitate was filtered and dried to give 0.168 g (92%) of **2** as an orange solid.

Method B: Compound **1** (3.7 g, 20 mmol) was added to acetonitrile (40 mL) with stirring at 0-5  $^\circ\text{C}$ . After dissolution, tert-butyl hypochlorite (5.52 mL, 60 mmol, 3.0 eq.) was added to the solution with stirring at 0-5  $^\circ\text{C}$ . After 5 h, the solvent was evaporated and dried under vacuum to leave a yellow solid (5.05 g, 69 % yield).

$T_d$  (onset): 221  $^\circ\text{C}$ .  $^1\text{H}$  NMR ( $d_6$ -acetone):  $\delta = 5.98$  (s, 4H), 2.46 (s, 6H) ppm;  $^{13}\text{C}$  NMR:  $\delta = 199.4, 161.8, 158.7, 59.4, 27.2$  ppm; IR (KBr pellet):  $\tilde{\nu} = 3003(\text{m}), 2951(\text{w}), 1734(\text{s}), 1556(\text{w}), 1501(\text{s}), 1463(\text{m}), 1420(\text{w}), 1365(\text{m}), 1341(\text{m}), 1319(\text{s}), 1184(\text{m}), 1158(\text{m}), 868(\text{m}), 850(\text{w}), 806(\text{w}), 745(\text{w}), 716(\text{w}), 629(\text{w}), 588(\text{w}), 496(\text{w})\text{ cm}^{-1}$ ; elemental analysis (%) calcd. for  $\text{C}_{10}\text{H}_{10}\text{N}_{10}\text{O}_6$  (366.25): C, 32.79; H, 2.75; N, 38.24; found: C, 33.03; H, 2.72; N, 38.10.

Synthesis of (*E*)-1,2-bis(3-nitro-1-(trinitromethyl)-1*H*-1,2,4-triazol-5-yl)diazene (**3**): Compound **2** (0.366 g, 1.0 mmol) was dissolved in sulfuric acid (98%, 1 mL) at 0  $^\circ\text{C}$ . After cooling to -5  $^\circ\text{C}$ , nitric acid (90%, 1 mL) was added dropwise. The reaction mixture was warmed slowly to room temperature and stirred for 72 h. The yellow

precipitate (**3**) was collected by filtration and dried giving 0.469 g (81%).  $T_d$  (onset): 175 °C.  $^{13}\text{C}$  NMR ( $\text{CD}_3\text{CN}$ ):  $\delta = 160.3, 159.9, 126.2$  ppm; IR (KBr pellet):  $\tilde{\nu} = 1732(\text{w}), 1646(\text{s}), 1626(\text{s}), 1601(\text{s}), 1569(\text{s}), 1520(\text{m}), 1454(\text{w}), 1385(\text{m}), 1348(\text{m}), 1332(\text{w}), 1307(\text{s}), 1274(\text{s}), 1185(\text{m}), 1029(\text{m}), 997(\text{w}), 845(\text{s}), 833(\text{s}), 792(\text{s}), 735(\text{m}), 702(\text{w}), 625(\text{w}), 588(\text{w}), 523(\text{w}), 489(\text{w}), 433(\text{w})$   $\text{cm}^{-1}$ ; elemental analysis (%) calcd. for  $\text{C}_6\text{N}_{16}\text{O}_{16}$  (552.16): C, 13.05; H, 0; N, 40.59; found: C, 13.34; H, 0.34; N, 40.38.

Synthesis of **4**: Compound **3** (0.138 g, 0.25 mmol) was added in batches to a solution of potassium iodide (0.166 g, 1 mmol) in methanol (3 mL) with stirring at 0 - 5 °C. After addition, the mixture was allowed to warm to room temperature. It was stirred for 4h, and the reaction mixture was maintained at - 20 °C for eight hours. The precipitate was collected by filtration and washed with methanol (2 mL) and then ethanol (7 mL) to give **4** (0.097 g, 84%) as a yellowish solid.  $T_d(\text{onset}) = 277$  °C,  $^{13}\text{C}$  NMR ( $d_6$ -DMSO)  $\delta = 166.9, 166.1, 163.6, 160.3, 159.1, 156.7, 155.6, 148.3, 144.8, 143.4, 131.4$  ppm; IR (KBr)  $\tilde{\nu} = 1739(\text{w}), 1713(\text{w}), 1604(\text{m}), 1557(\text{m}), 1520(\text{m}), 1472(\text{s}), 1400(\text{w}), 1357(\text{w}), 1312(\text{s}), 1223(\text{s}), 1219(\text{s}), 1159(\text{s}), 1074(\text{w}), 1034(\text{w}), 1013(\text{w}), 891(\text{m}), 841(\text{w}), 830(\text{w}), 807(\text{m}), 768(\text{w}), 749(\text{w}), 737(\text{m}), 727(\text{w}), 672(\text{w}), 656(\text{w}), 611(\text{w}), 572(\text{w}), 459(\text{w}), 448(\text{w}), 438(\text{w}), 430(\text{w})$   $\text{cm}^{-1}$ ; Elemental analysis (%): Calcd. for  $\text{C}_6\text{K}_2\text{N}_{14}\text{O}_9$  (462.34): C, 15.59; H, 0.00; N, 36.36; found: C, 15.23; H, 0.183; N, 36.74.

Synthesis of **5**: To a solution of potassium hydroxide (0.044 g, 0.65 mmol) in ethanol (2 mL) was added a solution of hydroxylamine hydrochloride (0.076 g, 1.09 mmol) in water (0.5 mL). The solid potassium chloride was removed by filtration, and a solution of **3** (0.100 g, 0.18 mmol) in ethanol (2 mL) was added dropwise to the mother liquor with stirring for 0.5 h at 0-5 °C. Then the mixture was allowed to warm to room temperature and stirred for 6h. The precipitate was collected by filtration and washed with ethanol (2 mL) to give **5** (0.030 g, 35 %) as a pale yellow solid.  $T_d(\text{onset}) = 292$  °C.  $^{13}\text{C}$  NMR ( $d_6$ -DMSO)  $\delta = 167.0, 160.3, 159.1, 148.3, 143.6, 131.5$  ppm; IR (KBr)  $\tilde{\nu} = 1732(\text{m}), 1602(\text{m}), 1557(\text{m}), 1521(\text{w}), 1472(\text{s}), 1423(\text{m}), 1362(\text{w}), 1327(\text{w}), 1311(\text{s}), 1270(\text{m}), 1215(\text{s}), 1158(\text{s}), 1097(\text{w}), 1034(\text{m}), 1014(\text{m}), 991(\text{w}), 897(\text{m}), 849(\text{m}), 818(\text{m}), 806(\text{s}), 765(\text{w}), 750(\text{m}), 737(\text{w}), 705(\text{w}), 655(\text{w}), 608(\text{w}), 566(\text{w}), 526(\text{w}), 466(\text{w})$   $\text{cm}^{-1}$ ; Elemental analysis (%): Calcd. for  $\text{C}_6\text{K}_2\text{N}_{14}\text{O}_{10}$  (478.34): C, 15.07; H, 0.00; N, 35.14; found: C, 15.34; H, 0.108; N, 35.86.

Synthesis of **7**: Compound **5** (0.0478 g, 0.1 mmol) was added to 5% sulfuric acid (1 mL). The reaction was stirred at room temperature for 0.5 h. The resulting solution was extracted with diethyl ether (5 × 5 mL). The organic solution was dried over anhydrous  $\text{MgSO}_4$ , and volatile solvent was removed by rotary evaporation to give **7** as a dark yellow solid (0.026 g, 65% yield).  $^1\text{H}$  NMR ( $d_6$ -DMSO):  $\delta = 7.87$  (s, 1H) ppm;  $^{13}\text{C}$  NMR ( $d_6$ -DMSO)  $\delta = 166.8, 160.4, 159.0, 148.4, 143.3, 131.4$  ppm; IR (KBr)  $\tilde{\nu} = 3436(\text{m}), 2923(\text{w}), 1784(\text{m}), 1686(\text{m}), 1591(\text{s}), 1523(\text{m}), 1481(\text{w}), 1413(\text{w}), 1396(\text{w}), 1306(\text{s}), 806(\text{s}), 789(\text{w}), 778(\text{w})$   $\text{cm}^{-1}$ ; elemental analysis (%): Calcd. for  $\text{C}_6\text{H}_2\text{N}_{12}\text{O}_{10}$  (402.16): C, 17.92; H, 0.50; N, 41.80; found: C, 17.90; H, 0.91; N, 39.96.

Synthesis of **8**: Compound **4** (0.0462 g, 0.1 mmol) was added to 5% sulfuric acid (1 mL). The reaction was stirred at room temperature for 0.5 h. The resulting solution was

extracted with diethyl ether ( $5 \times 5$  mL). The organic solution was dried over anhydrous  $\text{MgSO}_4$ , and then five drops 7 N ammonia methanol solution was added to the solution. After stirring for 5h at room temperature, the precipitate removed by filtration and dried in a vacuum. The product was obtained as a yellow solid (0.077 g, 73%).  $T_d$  (onset) = 175 °C,  $^1\text{H}$  NMR ( $d_6$ -DMSO):  $\delta = 7.12$  (s, 4H) ppm;  $^{13}\text{C}$  NMR ( $d_6$ -DMSO)  $\delta = 163.2, 159.1, 157.0, 148.4, 143.4, 131.5$  ppm; IR (KBr)  $\tilde{\nu} = 3441(\text{s}), 3153(\text{s}), 1725(\text{s}), 1617(\text{s}), 1610(\text{m}), 1556(\text{m}), 1485(\text{s}), 1398(\text{s}), 1378(\text{m}), 1320(\text{s}), 1253(\text{s}), 1189(\text{m}), 1099(\text{w}), 1027(\text{w}), 1008(\text{w}), 893(\text{m}), 856(\text{w}), 815(\text{m}), 743(\text{m}), 690(\text{w}), 683(\text{w})$   $\text{cm}^{-1}$ ; Elemental analysis (%): Calcd. for  $\text{C}_6\text{H}_8\text{N}_{14}\text{O}_9$  (420.22): C, 17.15; H, 1.92; N, 46.67; found: C, 17.30; H, 2.59; N, 48.85.

Synthesis of **9**: Compound **5** (0.0478 g, 0.1 mmol) was added to 5% sulfuric acid (1 mL). The reaction was stirred at room temperature for 0.5 h. The resulting solution was extracted with diethyl ether ( $5 \times 5$  mL). The organic solution was dried over anhydrous  $\text{MgSO}_4$ , and then five drops of 7 N ammonia in methanol was added to the solution. After stirring for 5h at room temperature, the solid was removed by filtration and dried in a vacuum. The product was obtained as a yellow solid (0.021 g, 45% yield).  $T_d$  (onset) = 202 °C,  $^1\text{H}$  NMR ( $d_6$ -DMSO):  $\delta = 7.09$  (s, 4H) ppm;  $^{13}\text{C}$  NMR ( $d_6$ -DMSO)  $\delta = 166.9, 160.3, 159.1, 148.4, 143.3, 131.4$  ppm; IR (KBr)  $\tilde{\nu} = 3222(\text{s}), 1743(\text{s}), 1608(\text{s}), 1569(\text{s}), 1536(\text{m}), 1488(\text{s}), 1398(\text{s}), 1329(\text{s}), 1311(\text{s}), 1268(\text{w}), 1220(\text{s}), 1154(\text{s}), 1028(\text{w}), 1001(\text{w}), 902(\text{m}), 843(\text{w}), 824(\text{m}), 809(\text{m}), 740(\text{m}), 683(\text{w})$   $\text{cm}^{-1}$ ; Elemental analysis (%): Calcd. for  $\text{C}_6\text{H}_8\text{N}_{14}\text{O}_{10}$  (436.22): C, 16.52; H, 1.85; N, 44.95; found: C, 16.74; H, 2.01; N, 47.09.

## Theoretical Calculations

The heats of formation were determined using isodesmic reactions (Scheme S1). The

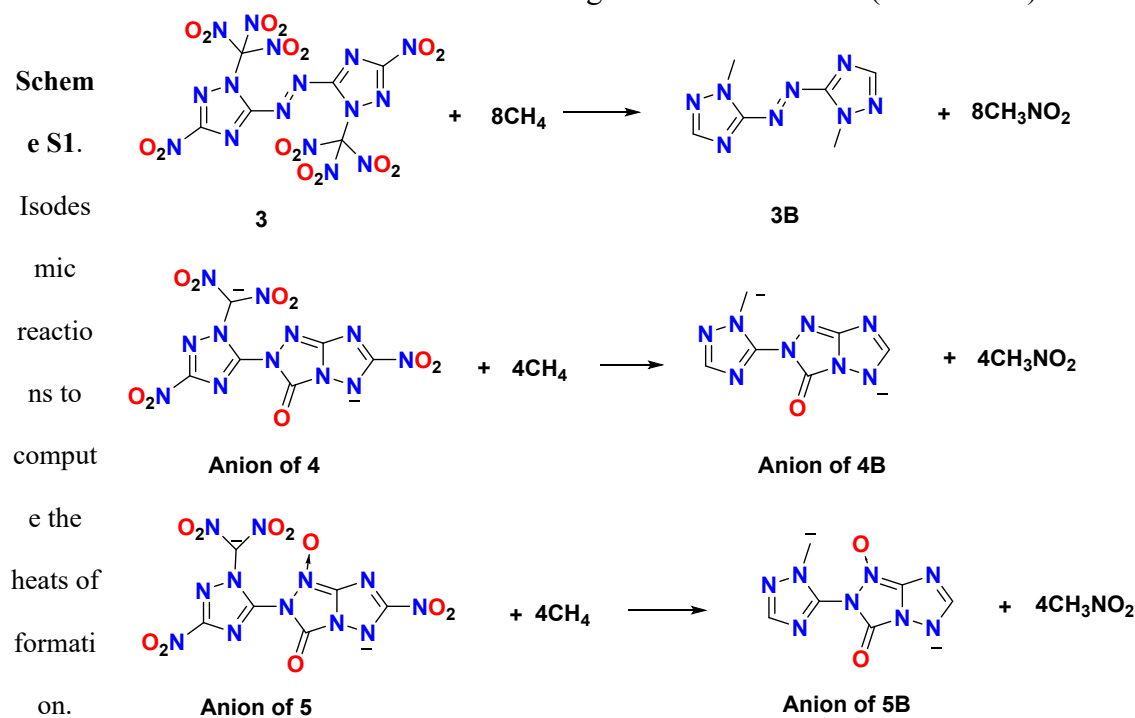

calculations were carried out using Gaussian 09 (Revision E.01) suite of programs.<sup>2</sup> The geometric optimization and frequency analyses of the structures were calculated at the M052X/6-31+G(d,p) level, and single energy points were calculated at the MP2/6-311++G(d,p) level. The heats of formation for **3B** and anions of **4B** and **5B** were obtained by an atomization approach using G2 ab initio method.<sup>3</sup> The heats of formation of other compounds in **Scheme S1** were obtained from the NIST WebBook.<sup>4</sup>

**Table S1** The heats of formation (HOF) for **3 - 5**.<sup>a</sup>

| Compounds                       | ZPE <sup>b</sup><br>(Hartree/Particle) | H <sub>T</sub> <sup>c</sup><br>(Hartree/Particle) | MP2-6-311++G**<br>(Hartree/Particle) | HOF(gas)<br>(kJ mol <sup>-1</sup> ) |
|---------------------------------|----------------------------------------|---------------------------------------------------|--------------------------------------|-------------------------------------|
| <b>3</b>                        | 0.188788                               | 0.221476                                          | -2302.23010                          | 778.0                               |
| CH <sub>4</sub>                 | 0.044793                               | 0.048605                                          | -40.33281                            | -74.6 <sup>d</sup>                  |
| CH <sub>3</sub> NO <sub>2</sub> | 0.04984                                | 0.055138                                          | -244.42534                           | -81.0 <sup>d</sup>                  |
| <b>3B</b>                       | 0.16977                                | 0.182657                                          | -669.57476                           | 606.3                               |
| Anion of <b>4</b>               | 0.137443                               | 0.159153                                          | -1558.79756                          | 181.1                               |
| Anion of <b>4B</b>              | 0.124127                               | 0.135935                                          | -742.28708                           | 575.2                               |
| Anion of <b>5</b>               | 0.14058                                | 0.163596                                          | -1633.78351                          | 230.4                               |
| Anion of <b>5B</b>              | 0.127257                               | 0.140439                                          | -817.28352                           | 597.0                               |

<sup>a</sup> The enthalpy of sublimation was calculated by using Trouton's rule. Solid-state heats of formation of the resulting compounds were calculated with Equation (1) in which T<sub>m</sub> is the melting temperature.  $\Delta H_f = \Delta H_f(g) - \Delta H_{sub} = \Delta H_f(g) - 188[\text{J mol}^{-1} \text{K}^{-1}] \times T_m$  (1). <sup>b</sup> Zero-point correction. <sup>c</sup> Thermal correction to enthalpy, i.e.,  $H_{298.15\text{K}} - H_{0\text{K}}$ . <sup>d</sup> D. R. Lide, CRC Handbook of Chemistry and Physics, 84th Edition (2003-2004), CRC Press/Taylor and Francis, Boca Raton, FL.

## Crystallographic Data

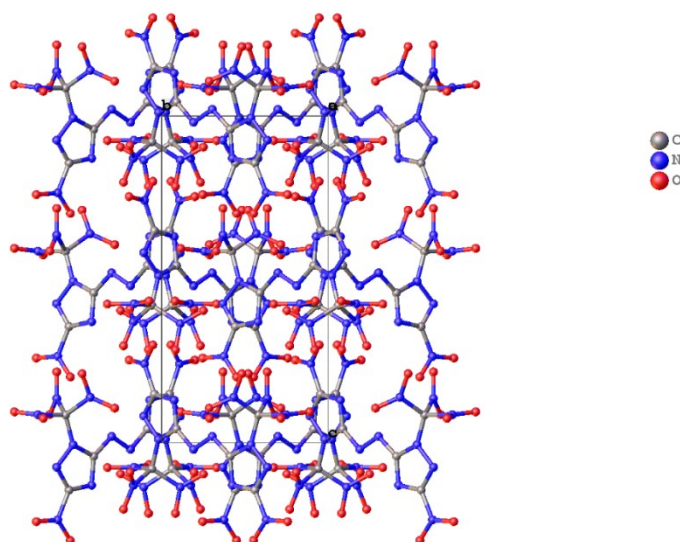

**Figure S1.** Packing diagram of **3**.

**Table S2.** Crystallographic data for compounds **3** - **5**.

| Compound                     | <b>3</b>                                       | <b>4</b>                                                     | <b>5</b>                                                      |
|------------------------------|------------------------------------------------|--------------------------------------------------------------|---------------------------------------------------------------|
| CCDC number                  | 2041417                                        | 2008399                                                      | 2008400                                                       |
| Formula                      | C <sub>6</sub> N <sub>16</sub> O <sub>16</sub> | C <sub>6</sub> K <sub>2</sub> N <sub>12</sub> O <sub>9</sub> | C <sub>6</sub> K <sub>2</sub> N <sub>12</sub> O <sub>10</sub> |
| $D_{calc.}/\text{g cm}^{-3}$ | 1.966                                          | 2.070                                                        | 2.131                                                         |
| Formula Weight               | 552.22                                         | 462.38                                                       | 478.38                                                        |
| Size/mm <sup>3</sup>         | 0.14×0.05×0.04                                 | 0.10×0.01×0.05                                               | 0.15×0.13×0.10                                                |
| $T/\text{K}$                 | 100.00(10)                                     | 271                                                          | 291                                                           |
| Crystal System               | orthorhombic                                   | Monoclinic                                                   | Monoclinic                                                    |
| Space Group                  | $Pca2_1$                                       | $P2_1/n$                                                     | $P2_1/n$                                                      |
| $a/\text{Å}$                 | 16.8883(2)                                     | 5.7691(4)                                                    | 5.7737(15)                                                    |
| $b/\text{Å}$                 | 7.48894(9)                                     | 29.1794(18)                                                  | 29.248(7)                                                     |
| $c/\text{Å}$                 | 14.7517(2)                                     | 9.0054(7)                                                    | 9.022(2)                                                      |
| $\alpha/^\circ$              | 90                                             | 90                                                           | 90                                                            |
| $\beta/^\circ$               | 90                                             | 101.820(3)                                                   | 101.847(3)                                                    |
| $\gamma/^\circ$              | 90                                             | 90                                                           | 90                                                            |
| $V/\text{Å}^3$               | 1865.73(4)                                     | 1483.81(18)                                                  | 1491.0(7)                                                     |
| $Z$                          | 4                                              | 4                                                            | 4                                                             |
| Wavelength/Å                 | 1.54184                                        | 0.71073                                                      | 0.71073                                                       |
| $Q_{min}/^\circ$             | 5.238                                          | 2.414                                                        | 2.41                                                          |
| $Q_{max}/^\circ$             | 77.252                                         | 26.485                                                       | 23.83                                                         |
| Indep't Refl's               | 3628                                           | 3006                                                         | 3401                                                          |
| Refl's $I \geq 2 \sigma(I)$  | 3501                                           | 2320                                                         | 2554                                                          |
| Parameters                   | 344                                            | 308                                                          | 271                                                           |
| GooF                         | 1.045                                          | 1.037                                                        | 1.456                                                         |
| $wR_2$ (all data)            | 0.0779                                         | 0.0899                                                       | 0.2213                                                        |
| $R_1$                        | 0.0309                                         | 0.0407                                                       | 0.0690                                                        |

**Table S3.** Fractional Atomic Coordinates ( $\times 10^4$ ) and Equivalent Isotropic Displacement Parameters ( $\text{Å}^2 \times 10^3$ ) for **3**.  $U_{eq}$  is defined as 1/3 of the trace of the orthogonalized  $U_{ij}$ .

| Atom | x          | y        | z          | $U_{eq}$ |
|------|------------|----------|------------|----------|
| O1   | 6808.9(12) | 11977(3) | 2468.0(14) | 25.3(4)  |
| O2   | 5759.8(13) | 10545(3) | 2001.8(14) | 26.0(4)  |
| O3   | 3969.9(14) | 4488(3)  | 7982.4(15) | 29.0(5)  |
| O4   | 3202.4(13) | 2445(3)  | 7405.5(14) | 25.4(4)  |
| O5   | 6592.9(14) | 7512(3)  | 5952.7(17) | 31.8(5)  |
| O6   | 6692.0(18) | 9190(3)  | 7152.5(17) | 42.7(6)  |
| O7   | 5138.5(12) | 11928(3) | 5898.7(14) | 27.2(4)  |
| O8   | 5942.6(16) | 12313(4) | 7028.7(16) | 43.9(6)  |
| O9   | 7756.3(12) | 10777(3) | 5662.3(15) | 29.3(5)  |
| O10  | 7098.3(15) | 13282(3) | 5753.8(17) | 33.8(5)  |
| O11  | 3207.0(13) | 7152(3)  | 3935.3(15) | 29.3(5)  |
| O12  | 2927.7(13) | 5195(3)  | 2882.4(15) | 31.6(5)  |

|     |            |          |            |         |
|-----|------------|----------|------------|---------|
| O13 | 4934.0(14) | 3249(3)  | 4131.1(17) | 37.7(5) |
| O14 | 4373.1(14) | 3669(4)  | 2828.4(16) | 39.0(6) |
| O15 | 3408(2)    | 1122(3)  | 4048.9(18) | 47.2(7) |
| O16 | 2381.9(15) | 2856(3)  | 4251.7(16) | 41.8(6) |
| N1  | 5123.9(14) | 8103(3)  | 5197.4(15) | 19.4(5) |
| N2  | 4697.2(13) | 6973(3)  | 4799.1(16) | 19.8(5) |
| N3  | 6150.1(13) | 10213(3) | 4892.1(14) | 16.6(4) |
| N4  | 6491.5(13) | 11098(3) | 4183.5(16) | 18.0(4) |
| N5  | 5494.7(13) | 9272(3)  | 3693.9(16) | 19.5(5) |
| N6  | 3767.6(13) | 4652(3)  | 5059.1(16) | 17.2(4) |
| N7  | 3454.0(13) | 3663(3)  | 5743.4(15) | 18.7(4) |
| N8  | 4307.0(14) | 5767(3)  | 6294.8(17) | 20.0(5) |
| N9  | 6222.8(14) | 11048(3) | 2580.6(15) | 19.6(5) |
| N10 | 3645.3(14) | 3728(3)  | 7353.1(16) | 20.7(5) |
| N11 | 6570.7(14) | 8898(3)  | 6352.0(17) | 23.5(5) |
| N12 | 5754.4(14) | 11726(3) | 6296.7(17) | 22.5(5) |
| N13 | 7163.1(14) | 11681(3) | 5741.9(16) | 23.6(5) |
| N14 | 3201.0(14) | 5686(3)  | 3603.5(17) | 21.9(5) |
| N15 | 4389.6(15) | 3670(3)  | 3643.3(16) | 22.2(5) |
| N16 | 3078.0(17) | 2535(4)  | 4135.8(17) | 29.9(6) |
| C1  | 5556.1(16) | 9129(3)  | 4574.3(18) | 18.0(5) |
| C2  | 6068.9(16) | 10457(3) | 3508.0(18) | 17.1(5) |
| C3  | 4279.6(16) | 5897(4)  | 5407.9(19) | 17.9(5) |
| C4  | 3801.1(16) | 4410(3)  | 6441.0(18) | 17.3(5) |
| C5  | 6387.3(15) | 10608(3) | 5791.3(18) | 18.0(5) |
| C6  | 3615.6(15) | 4199(3)  | 4143.7(19) | 18.3(5) |

**Table S4.** Anisotropic Displacement Parameters ( $\times 10^4$ ) for **3**. The anisotropic displacement factor exponent takes the form:  $-2p^2[h^2a^{*2} \times U_{11} + \dots + 2hka^* \times b^* \times U_{12}]$

| Atom | $U_{11}$ | $U_{22}$ | $U_{33}$ | $U_{23}$  | $U_{13}$ | $U_{12}$ |
|------|----------|----------|----------|-----------|----------|----------|
| O1   | 24.1(10) | 29.8(10) | 22.0(10) | 2.1(8)    | 2.3(8)   | -7.9(8)  |
| O2   | 30.2(11) | 27.1(10) | 20.7(10) | 0.8(8)    | -6.7(8)  | -5.1(9)  |
| O3   | 35.8(12) | 33.0(12) | 18.1(10) | -0.4(8)   | -2.0(9)  | -3.6(9)  |
| O4   | 29.9(10) | 23.6(10) | 22.5(10) | 4.8(8)    | 3.7(8)   | -3.1(8)  |
| O5   | 37.2(12) | 23.7(10) | 34.7(12) | 0.3(9)    | 2.1(9)   | 6.7(9)   |
| O6   | 66.5(17) | 42.3(14) | 19.2(11) | 6.0(10)   | -5.1(10) | 4.5(12)  |
| O7   | 24.3(10) | 30.6(10) | 26.6(11) | -0.1(9)   | 1.0(8)   | 7.7(8)   |
| O8   | 46.0(15) | 58.7(16) | 27.1(12) | -23.8(11) | -4.6(11) | 10.8(12) |
| O9   | 18.9(10) | 46.1(12) | 22.8(10) | -1.3(9)   | 0.1(8)   | -1.4(9)  |
| O10  | 43.8(13) | 22.3(11) | 35.4(12) | 1.5(9)    | -4.0(10) | -10.9(9) |
| O11  | 32.1(12) | 24.6(11) | 31.1(12) | -0.3(8)   | 0.0(9)   | 6.2(8)   |
| O12  | 32.3(12) | 36.7(12) | 25.7(11) | 3.3(9)    | -8.1(9)  | -5.0(9)  |

|     |          |          |          |          |          |           |
|-----|----------|----------|----------|----------|----------|-----------|
| O13 | 38.4(12) | 45.2(13) | 29.6(12) | 4.7(11)  | 2.8(10)  | 24.2(10)  |
| O14 | 36.5(12) | 62.1(17) | 18.3(11) | -4.8(11) | 6.3(9)   | -3.2(11)  |
| O15 | 91(2)    | 19.4(11) | 30.9(13) | -5.4(10) | 17.3(13) | -16.5(12) |
| O16 | 38.1(14) | 63.1(15) | 24.2(12) | 10.3(11) | -7.0(10) | -30.1(12) |
| N1  | 22.0(11) | 17.6(10) | 18.6(11) | -1.4(8)  | 3.5(9)   | -3.8(9)   |
| N2  | 20.3(11) | 18.5(10) | 20.4(11) | -1.4(9)  | 1.7(9)   | -4.1(8)   |
| N3  | 17.7(10) | 17.3(10) | 14.8(11) | -0.9(8)  | 1.7(8)   | -2.8(8)   |
| N4  | 18.8(10) | 16.9(10) | 18.3(11) | 1.8(9)   | 2.8(9)   | 0.1(8)    |
| N5  | 21.0(11) | 19.6(11) | 18.0(11) | -1.6(9)  | 0.5(9)   | -0.6(9)   |
| N6  | 19.7(10) | 17.0(10) | 14.8(10) | -0.8(8)  | 1.9(8)   | -3.9(8)   |
| N7  | 20.7(11) | 17.3(10) | 18.0(11) | 2.5(9)   | 3.5(9)   | 0.6(8)    |
| N8  | 22.3(11) | 19.4(11) | 18.4(11) | -1.5(9)  | 1.2(8)   | -1.1(9)   |
| N9  | 23.1(11) | 20.1(11) | 15.4(11) | 0.1(8)   | 0.4(9)   | -0.1(9)   |
| N10 | 22.5(11) | 21.2(11) | 18.5(11) | 0.5(9)   | 1.5(9)   | 3.4(9)    |
| N11 | 23.5(12) | 26.5(12) | 20.4(12) | 5.3(10)  | 0.8(9)   | 1.3(9)    |
| N12 | 24.9(11) | 21.6(11) | 21.0(12) | -3.5(9)  | 1.6(9)   | 1.9(9)    |
| N13 | 24.1(12) | 29.2(13) | 17.4(11) | -0.1(9)  | -3.3(9)  | -6.9(10)  |
| N14 | 19.9(11) | 24.8(12) | 21.2(12) | 2.8(9)   | -2.1(9)  | -2.4(9)   |
| N15 | 30.3(13) | 18.5(11) | 17.9(11) | -1.6(9)  | 1.9(9)   | 2.2(9)    |
| N16 | 42.8(16) | 33.1(14) | 13.9(12) | -1.1(11) | 1.5(11)  | -19.6(12) |
| C1  | 20.3(12) | 17.0(12) | 16.8(13) | -2.5(10) | 2.8(9)   | -3.1(9)   |
| C2  | 18.6(12) | 17.0(12) | 15.6(12) | -1.3(10) | 2.1(9)   | -0.4(9)   |
| C3  | 18.3(12) | 16.5(12) | 19.0(13) | -1.8(10) | 1.7(10)  | -0.9(10)  |
| C4  | 19.4(12) | 15.1(12) | 17.4(13) | -0.6(9)  | 2.1(10)  | 1.8(9)    |
| C5  | 19.6(12) | 19.1(12) | 15.3(13) | -1.9(10) | 0.3(10)  | -1.5(10)  |
| C6  | 22.8(12) | 16.6(11) | 15.5(12) | 0.8(10)  | 0.7(10)  | -3.7(9)   |

**Table S5.** Bond Lengths in Å for **3**.

| Atom | Atom | Length/Å | Atom | Atom | Length/Å |
|------|------|----------|------|------|----------|
| O1   | N9   | 1.221(3) | N3   | C1   | 1.373(3) |
| O2   | N9   | 1.218(3) | N3   | C5   | 1.417(3) |
| O3   | N10  | 1.219(3) | N4   | C2   | 1.316(4) |
| O4   | N10  | 1.220(3) | N5   | C1   | 1.307(4) |
| O5   | N11  | 1.194(3) | N5   | C2   | 1.343(4) |
| O6   | N11  | 1.218(4) | N6   | N7   | 1.359(3) |
| O7   | N12  | 1.204(3) | N6   | C3   | 1.372(3) |
| O8   | N12  | 1.209(3) | N6   | C6   | 1.416(4) |
| O9   | N13  | 1.215(3) | N7   | C4   | 1.310(4) |
| O10  | N13  | 1.204(3) | N8   | C3   | 1.313(4) |
| O11  | N14  | 1.203(3) | N8   | C4   | 1.345(3) |
| O12  | N14  | 1.216(3) | N9   | C2   | 1.461(3) |
| O13  | N15  | 1.209(3) | N10  | C4   | 1.463(3) |
| O14  | N15  | 1.202(3) | N11  | C5   | 1.556(3) |



|     |     |          |     |    |          |
|-----|-----|----------|-----|----|----------|
| O15 | N16 | 1.202(4) | N12 | C5 | 1.549(3) |
| O16 | N16 | 1.212(4) | N13 | C5 | 1.539(3) |
| N1  | N2  | 1.258(3) | N14 | C6 | 1.538(4) |
| N1  | C1  | 1.403(3) | N15 | C6 | 1.553(4) |
| N2  | C3  | 1.398(3) | N16 | C6 | 1.542(3) |
| N3  | N4  | 1.365(3) |     |    |          |

**Table S6.** Bond Angles in ° for **3**.

| Atom | Atom | Atom | Angle/°  | Atom | Atom | Atom | Angle/°  |
|------|------|------|----------|------|------|------|----------|
| N2   | N1   | C1   | 111.1(2) | O13  | N15  | C6   | 115.1(2) |
| N1   | N2   | C3   | 112.2(2) | O14  | N15  | O13  | 127.8(3) |
| N4   | N3   | C1   | 109.5(2) | O14  | N15  | C6   | 117.1(2) |
| N4   | N3   | C5   | 119.8(2) | O15  | N16  | O16  | 129.7(3) |
| C1   | N3   | C5   | 130.5(2) | O15  | N16  | C6   | 116.0(3) |
| C2   | N4   | N3   | 100.0(2) | O16  | N16  | C6   | 114.2(3) |
| C1   | N5   | C2   | 101.5(2) | N3   | C1   | N1   | 118.7(2) |
| N7   | N6   | C3   | 109.7(2) | N5   | C1   | N1   | 130.9(3) |
| N7   | N6   | C6   | 120.5(2) | N5   | C1   | N3   | 110.4(2) |
| C3   | N6   | C6   | 129.4(2) | N4   | C2   | N5   | 118.5(2) |
| C4   | N7   | N6   | 100.2(2) | N4   | C2   | N9   | 120.1(2) |
| C3   | N8   | C4   | 101.1(2) | N5   | C2   | N9   | 121.3(2) |
| O1   | N9   | C2   | 116.4(2) | N6   | C3   | N2   | 118.0(2) |
| O2   | N9   | O1   | 127.0(2) | N8   | C3   | N2   | 131.7(3) |
| O2   | N9   | C2   | 116.7(2) | N8   | C3   | N6   | 110.2(2) |
| O3   | N10  | O4   | 126.5(2) | N7   | C4   | N8   | 118.8(2) |
| O3   | N10  | C4   | 117.1(2) | N7   | C4   | N10  | 119.5(2) |
| O4   | N10  | C4   | 116.3(2) | N8   | C4   | N10  | 121.7(2) |
| O5   | N11  | O6   | 129.0(3) | N3   | C5   | N11  | 112.5(2) |
| O5   | N11  | C5   | 117.4(2) | N3   | C5   | N12  | 111.6(2) |
| O6   | N11  | C5   | 113.7(2) | N3   | C5   | N13  | 107.8(2) |
| O7   | N12  | O8   | 128.1(3) | N12  | C5   | N11  | 109.0(2) |
| O7   | N12  | C5   | 115.4(2) | N13  | C5   | N11  | 106.6(2) |
| O8   | N12  | C5   | 116.4(2) | N13  | C5   | N12  | 109.1(2) |
| O9   | N13  | C5   | 114.6(2) | N6   | C6   | N14  | 113.8(2) |
| O10  | N13  | O9   | 129.1(3) | N6   | C6   | N15  | 111.2(2) |
| O10  | N13  | C5   | 116.2(2) | N6   | C6   | N16  | 107.9(2) |
| O11  | N14  | O12  | 129.4(3) | N14  | C6   | N15  | 108.8(2) |
| O11  | N14  | C6   | 116.5(2) | N14  | C6   | N16  | 108.3(2) |
| O12  | N14  | C6   | 114.0(2) | N16  | C6   | N15  | 106.6(2) |

**Table S7.** Bond Lengths in Å for **4**.

| Atom | Atom | Length/Å | Atom | Atom | Length/Å |
|------|------|----------|------|------|----------|
| O1   | N1   | 1.227(3) | N7   | C2   | 1.372(3) |

|     |     |           |      |      |           |
|-----|-----|-----------|------|------|-----------|
| O2  | N1  | 1.226(3)  | N7   | C6A  | 1.396(6)  |
| O3  | N5  | 1.245(3)  | N7   | N12B | 1.445(12) |
| O4  | N5  | 1.239(3)  | N7   | C6B  | 1.391(12) |
| O5  | N6  | 1.244(3)  | N7   | N12A | 1.441(5)  |
| O6  | N6  | 1.242(3)  | N8A  | N9   | 1.383(5)  |
| O7A | C6A | 1.237(6)  | N8A  | C5A  | 1.370(10) |
| O7B | C6B | 1.229(13) | N8A  | C6A  | 1.342(8)  |
| O9  | N11 | 1.228(4)  | N8B  | C5B  | 1.35(3)   |
| O10 | N11 | 1.222(5)  | N8B  | C6B  | 1.343(16) |
| N1  | C1  | 1.455(3)  | N8B  | N10  | 1.387(16) |
| N2  | C2  | 1.324(3)  | N9   | C7   | 1.337(4)  |
| N2  | C1  | 1.347(3)  | N9   | C5B  | 1.392(11) |
| N3  | N4  | 1.376(3)  | N10  | C7   | 1.331(4)  |
| N3  | C2  | 1.358(3)  | N10  | C5A  | 1.365(8)  |
| N3  | C3  | 1.393(3)  | N11  | C7   | 1.469(4)  |
| N4  | C1  | 1.301(3)  | N12A | C5A  | 1.339(7)  |
| N5  | C3  | 1.379(3)  | N12B | C5B  | 1.34(2)   |
| N6  | C3  | 1.373(3)  |      |      |           |

**Table S8.** Bond Angles in ° for 4.

| Atom | Atom | Atom | Angle/°    | Atom | Atom | Atom | Angle/°   |
|------|------|------|------------|------|------|------|-----------|
| O1   | N1   | O2   | 125.0(2)   | C5A  | N10  | C7   | 101.8(4)  |
| O1   | N1   | C1   | 117.3(2)   | N8B  | N10  | C7   | 89.0(6)   |
| O2   | N1   | C1   | 117.6(2)   | O10  | N11  | C7   | 116.7(3)  |
| C1   | N2   | C2   | 100.4(2)   | O9   | N11  | O10  | 125.5(3)  |
| N4   | N3   | C2   | 108.87(19) | O9   | N11  | C7   | 117.8(3)  |
| N4   | N3   | C3   | 121.66(19) | N7   | N12A | C5A  | 98.5(5)   |
| C2   | N3   | C3   | 129.2(2)   | N7   | N12B | C5B  | 98.4(11)  |
| N3   | N4   | C1   | 100.4(2)   | N1   | C1   | N4   | 120.0(2)  |
| O3   | N5   | O4   | 122.1(2)   | N2   | C1   | N4   | 119.1(2)  |
| O3   | N5   | C3   | 117.0(2)   | N1   | C1   | N2   | 120.7(2)  |
| O4   | N5   | C3   | 121.0(2)   | N3   | C2   | N7   | 123.7(2)  |
| O5   | N6   | O6   | 121.8(3)   | N2   | C2   | N3   | 111.2(2)  |
| O5   | N6   | C3   | 121.8(2)   | N2   | C2   | N7   | 125.1(2)  |
| O6   | N6   | C3   | 116.4(2)   | N3   | C3   | N6   | 117.3(2)  |
| N12A | N7   | C2   | 119.5(2)   | N5   | C3   | N6   | 124.9(2)  |
| N12A | N7   | C6A  | 115.6(3)   | N3   | C3   | N5   | 117.8(2)  |
| C2   | N7   | C6A  | 124.8(3)   | N8A  | C5A  | N10  | 105.1(4)  |
| N12B | N7   | C2   | 116.9(5)   | N8A  | C5A  | N12A | 113.6(6)  |
| C2   | N7   | C6B  | 128.5(5)   | N10  | C5A  | N12A | 141.2(7)  |
| N12B | N7   | C6B  | 114.5(7)   | N9   | C5B  | N12B | 149.1(16) |
| N9   | N8A  | C5A  | 116.3(5)   | N8B  | C5B  | N12B | 114.5(11) |
| N9   | N8A  | C6A  | 132.1(5)   | N8B  | C5B  | N9   | 96.3(12)  |

|     |     |     |           |     |     |     |           |
|-----|-----|-----|-----------|-----|-----|-----|-----------|
| C5A | N8A | C6A | 111.5(5)  | O7A | C6A | N7  | 126.3(5)  |
| C5B | N8B | C6B | 110.9(13) | O7A | C6A | N8A | 132.9(5)  |
| N10 | N8B | C5B | 126.3(10) | N7  | C6A | N8A | 100.8(4)  |
| N10 | N8B | C6B | 122.7(13) | O7B | C6B | N7  | 127.2(9)  |
| N8A | N9  | C7  | 94.3(3)   | N7  | C6B | N8B | 101.8(11) |
| C5B | N9  | C7  | 105.9(8)  | O7B | C6B | N8B | 131.0(12) |
| N9  | C7  | N10 | 122.5(3)  | N10 | C7  | N11 | 120.5(3)  |
| N9  | C7  | N11 | 116.9(3)  |     |     |     |           |

**Table S9.** Torsion Angles in ° for **4**.

| Atom | Atom | Atom | Atom | Angle/°   |
|------|------|------|------|-----------|
| O1   | N1   | C1   | N2   | -13.2(4)  |
| O1   | N1   | C1   | N4   | 172.1(2)  |
| O2   | N1   | C1   | N2   | 164.0(2)  |
| O2   | N1   | C1   | N4   | -10.7(4)  |
| C2   | N2   | C1   | N1   | -173.4(2) |
| C2   | N2   | C1   | N4   | 1.3(3)    |
| C1   | N2   | C2   | N3   | -1.6(3)   |
| C1   | N2   | C2   | N7   | 178.0(2)  |
| C2   | N3   | N4   | C1   | -0.6(3)   |
| C3   | N3   | N4   | C1   | 174.1(2)  |
| N4   | N3   | C2   | N2   | 1.5(3)    |
| N4   | N3   | C2   | N7   | -178.1(2) |
| C3   | N3   | C2   | N2   | -172.7(2) |
| C3   | N3   | C2   | N7   | 7.8(4)    |
| N4   | N3   | C3   | N5   | 80.6(3)   |
| N4   | N3   | C3   | N6   | -102.1(3) |
| C2   | N3   | C3   | N5   | -106.0(3) |
| C2   | N3   | C3   | N6   | 71.4(3)   |
| N3   | N4   | C1   | N1   | 174.3(2)  |
| N3   | N4   | C1   | N2   | -0.5(3)   |
| O3   | N5   | C3   | N3   | -5.1(4)   |
| O3   | N5   | C3   | N6   | 177.8(2)  |
| O4   | N5   | C3   | N3   | 174.9(2)  |
| O4   | N5   | C3   | N6   | -2.3(4)   |
| O5   | N6   | C3   | N3   | -172.5(2) |
| O5   | N6   | C3   | N5   | 4.7(4)    |
| O6   | N6   | C3   | N3   | 6.9(4)    |
| O6   | N6   | C3   | N5   | -176.0(3) |
| C2   | N7   | N12A | C5A  | 175.7(3)  |
| C6A  | N7   | N12A | C5A  | -0.2(4)   |
| N12A | N7   | C2   | N2   | -145.2(3) |
| N12A | N7   | C2   | N3   | 34.3(4)   |

|      |      |     |      |           |
|------|------|-----|------|-----------|
| C6A  | N7   | C2  | N2   | 30.2(4)   |
| C6A  | N7   | C2  | N3   | -150.3(3) |
| N12A | N7   | C6A | O7A  | 178.2(4)  |
| N12A | N7   | C6A | N8A  | -0.1(5)   |
| C2   | N7   | C6A | O7A  | 2.7(7)    |
| C2   | N7   | C6A | N8A  | -175.7(3) |
| C5A  | N8A  | N9  | C7   | 0.0(4)    |
| C6A  | N8A  | N9  | C7   | 176.0(5)  |
| N9   | N8A  | C5A | N10  | -0.8(5)   |
| N9   | N8A  | C5A | N12A | 176.3(4)  |
| C6A  | N8A  | C5A | N10  | -177.6(4) |
| C6A  | N8A  | C5A | N12A | -0.5(6)   |
| N9   | N8A  | C6A | O7A  | 6.1(10)   |
| N9   | N8A  | C6A | N7   | -175.8(4) |
| C5A  | N8A  | C6A | O7A  | -177.8(6) |
| C5A  | N8A  | C6A | N7   | 0.4(5)    |
| N8A  | N9   | C7  | N10  | 0.9(4)    |
| N8A  | N9   | C7  | N11  | -178.0(3) |
| C7   | N10  | C5A | N8A  | 1.2(4)    |
| C7   | N10  | C5A | N12A | -174.6(7) |
| C5A  | N10  | C7  | N9   | -1.4(4)   |
| C5A  | N10  | C7  | N11  | 177.4(3)  |
| O9   | N11  | C7  | N9   | -10.4(4)  |
| O9   | N11  | C7  | N10  | 170.8(3)  |
| O10  | N11  | C7  | N9   | 168.7(3)  |
| O10  | N11  | C7  | N10  | -10.2(4)  |
| N7   | N12A | C5A | N8A  | 0.4(5)    |
| N7   | N12A | C5A | N10  | 175.9(6)  |

**Table S10.** Bond Lengths in Å for **5**

| Atom | Atom | Length/Å | Atom | Atom | Length/Å |
|------|------|----------|------|------|----------|
| O1   | N5   | 1.239(5) | N3   | C3   | 1.401(5) |
| O2   | N5   | 1.230(5) | N4   | C1   | 1.309(5) |
| O3   | N6   | 1.236(5) | N5   | C3   | 1.373(5) |
| O4   | N6   | 1.233(5) | N6   | C3   | 1.372(6) |
| O5   | N1   | 1.225(5) | N7   | N8   | 1.411(5) |
| O6   | N1   | 1.229(5) | N7   | C2   | 1.376(5) |
| O7   | N8   | 1.121(7) | N7   | C4   | 1.409(5) |
| O8   | C4   | 1.172(5) | N8   | C5   | 1.336(5) |
| O9   | N12  | 1.209(8) | N9   | N10  | 1.378(5) |
| O10  | N12  | 1.220(7) | N9   | C4   | 1.354(5) |
| N1   | C1   | 1.456(5) | N9   | C5   | 1.366(5) |
| N2   | C1   | 1.339(5) | N10  | C6   | 1.335(7) |

|    |    |          |     |    |          |
|----|----|----------|-----|----|----------|
| N2 | C2 | 1.313(5) | N11 | C5 | 1.349(6) |
| N3 | N4 | 1.376(5) | N11 | C6 | 1.331(6) |
| N3 | C2 | 1.364(5) | N12 | C6 | 1.461(7) |

**Table S11.** Bond Angles in ° for **5**.

| Atom | Atom | Atom | Angle/°  | Atom | Atom | Atom | Angle/°  |
|------|------|------|----------|------|------|------|----------|
| O5   | N1   | O6   | 125.8(4) | N9   | N10  | C6   | 97.7(4)  |
| O5   | N1   | C1   | 117.6(3) | C5   | N11  | C6   | 99.3(4)  |
| O6   | N1   | C1   | 116.6(3) | O9   | N12  | O10  | 124.3(5) |
| C1   | N2   | C2   | 101.0(3) | O9   | N12  | C6   | 117.9(5) |
| N4   | N3   | C2   | 108.8(3) | O10  | N12  | C6   | 117.8(5) |
| N4   | N3   | C3   | 122.0(3) | N1   | C1   | N2   | 121.4(3) |
| C2   | N3   | C3   | 128.9(3) | N1   | C1   | N4   | 119.4(3) |
| N3   | N4   | C1   | 100.1(3) | N2   | C1   | N4   | 119.0(3) |
| O1   | N5   | O2   | 122.4(4) | N2   | C2   | N3   | 111.0(3) |
| O1   | N5   | C3   | 116.5(3) | N2   | C2   | N7   | 125.5(3) |
| O2   | N5   | C3   | 121.1(4) | N3   | C2   | N7   | 123.5(3) |
| O3   | N6   | O4   | 122.1(4) | N3   | C3   | N5   | 118.0(4) |
| O3   | N6   | C3   | 121.3(3) | N3   | C3   | N6   | 16.9(3)  |
| O4   | N6   | C3   | 116.6(3) | N5   | C3   | N6   | 125.1(3) |
| N8   | N7   | C2   | 122.2(3) | O8   | C4   | N7   | 130.4(4) |
| N8   | N7   | C4   | 116.0(3) | O8   | C4   | N9   | 130.5(4) |
| C2   | N7   | C4   | 121.7(3) | N7   | C4   | N9   | 99.1(3)  |
| O7   | N8   | N7   | 137.7(5) | N8   | C5   | N9   | 112.2(3) |
| O7   | N8   | C5   | 122.2(5) | N8   | C5   | N11  | 137.2(4) |
| N7   | N8   | C5   | 100.1(3) | N9   | C5   | N11  | 110.5(4) |
| N10  | N9   | C4   | 136.4(4) | N10  | C6   | N11  | 121.7(4) |
| N10  | N9   | C5   | 110.8(3) | N10  | C6   | N12  | 117.4(4) |
| C4   | N9   | C5   | 112.7(3) | N11  | C6   | N12  | 120.9(5) |

**Table S12.** Torsion Angles in ° for **5**.

| Atom | Atom | Atom | Atom | Angle/°   |
|------|------|------|------|-----------|
| O5   | N1   | C1   | N2   | 163.7(4)  |
| O5   | N1   | C1   | N4   | -10.3(5)  |
| O6   | N1   | C1   | N2   | -14.0(5)  |
| O6   | N1   | C1   | N4   | 172.1(4)  |
| C2   | N2   | C1   | N1   | -172.7(3) |
| C2   | N2   | C1   | N4   | 1.3(5)    |
| C1   | N2   | C2   | N3   | -1.8(4)   |
| C1   | N2   | C2   | N7   | 178.4(4)  |
| C2   | N3   | N4   | C1   | -0.9(4)   |
| C3   | N3   | N4   | C1   | 174.2(3)  |

|     |    |     |     |           |
|-----|----|-----|-----|-----------|
| N4  | N3 | C2  | N2  | 1.8(4)    |
| N4  | N3 | C2  | N7  | -178.3(3) |
| C3  | N3 | C2  | N2  | -172.9(4) |
| C3  | N3 | C2  | N7  | 7.0(6)    |
| N4  | N3 | C3  | N5  | 79.9(5)   |
| N4  | N3 | C3  | N6  | -101.6(4) |
| C2  | N3 | C3  | N5  | -106.1(5) |
| C2  | N3 | C3  | N6  | 72.4(5)   |
| N3  | N4 | C1  | N1  | 173.9(3)  |
| N3  | N4 | C1  | N2  | -0.2(5)   |
| O1  | N5 | C3  | N3  | -5.1(6)   |
| O1  | N5 | C3  | N6  | 176.6(4)  |
| O2  | N5 | C3  | N3  | 175.3(4)  |
| O2  | N5 | C3  | N6  | -3.1(7)   |
| O3  | N6 | C3  | N3  | -173.6(4) |
| O3  | N6 | C3  | N5  | 4.8(7)    |
| O4  | N6 | C3  | N3  | 5.7(6)    |
| O4  | N6 | C3  | N5  | -175.9(4) |
| C2  | N7 | N8  | O7  | -2.6(8)   |
| C2  | N7 | N8  | C5  | 175.2(3)  |
| C4  | N7 | N8  | O7  | -178.1(6) |
| C4  | N7 | N8  | C5  | -0.3(4)   |
| N8  | N7 | C2  | N2  | -145.2(4) |
| N8  | N7 | C2  | N3  | 35.0(5)   |
| C4  | N7 | C2  | N2  | 30.0(6)   |
| C4  | N7 | C2  | N3  | -149.8(4) |
| N8  | N7 | C4  | O8  | 177.7(4)  |
| N8  | N7 | C4  | N9  | 0.1(4)    |
| C2  | N7 | C4  | O8  | 2.2(7)    |
| C2  | N7 | C4  | N9  | -175.4(3) |
| O7  | N8 | C5  | N9  | 178.6(5)  |
| O7  | N8 | C5  | N11 | 0.4(4)    |
| N7  | N8 | C5  | N9  | 176.3(5)  |
| N7  | N8 | C5  | N11 | 175.9(5)  |
| C4  | N9 | N10 | C6  | 0.8(4)    |
| C5  | N9 | N10 | C6  | 7.5(8)    |
| N10 | N9 | C4  | O8  | -174.8(4) |
| N10 | N9 | C4  | N7  | -177.5(4) |
| C5  | N9 | C4  | O8  | 0.2(4)    |
| C5  | N9 | C4  | N7  | 175.9(3)  |
| N10 | N9 | C5  | N8  | -1.1(5)   |
| N10 | N9 | C5  | N11 | -0.4(5)   |
| C4  | N9 | C5  | N8  | -177.4(3) |
| C4  | N9 | C5  | N11 | -0.4(5)   |

|     |     |    |     |           |
|-----|-----|----|-----|-----------|
| N9  | N10 | C6 | N11 | -177.5(4) |
| N9  | N10 | C6 | N12 | -2.6(8)   |
| C6  | N11 | C5 | N8  | -175.1(5) |
| C6  | N11 | C5 | N9  | 0.8(4)    |
| C5  | N11 | C6 | N10 | -0.3(5)   |
| C5  | N11 | C6 | N12 | 176.8(4)  |
| O9  | N12 | C6 | N10 | 168.5(4)  |
| O9  | N12 | C6 | N11 | -8.7(7)   |
| O10 | N12 | C6 | N10 | -12.1(6)  |
| O10 | N12 | C6 | N11 | 170.7(4)  |

## NMR and IR spectra and DSC plots of 2 – 5, 7 - 9

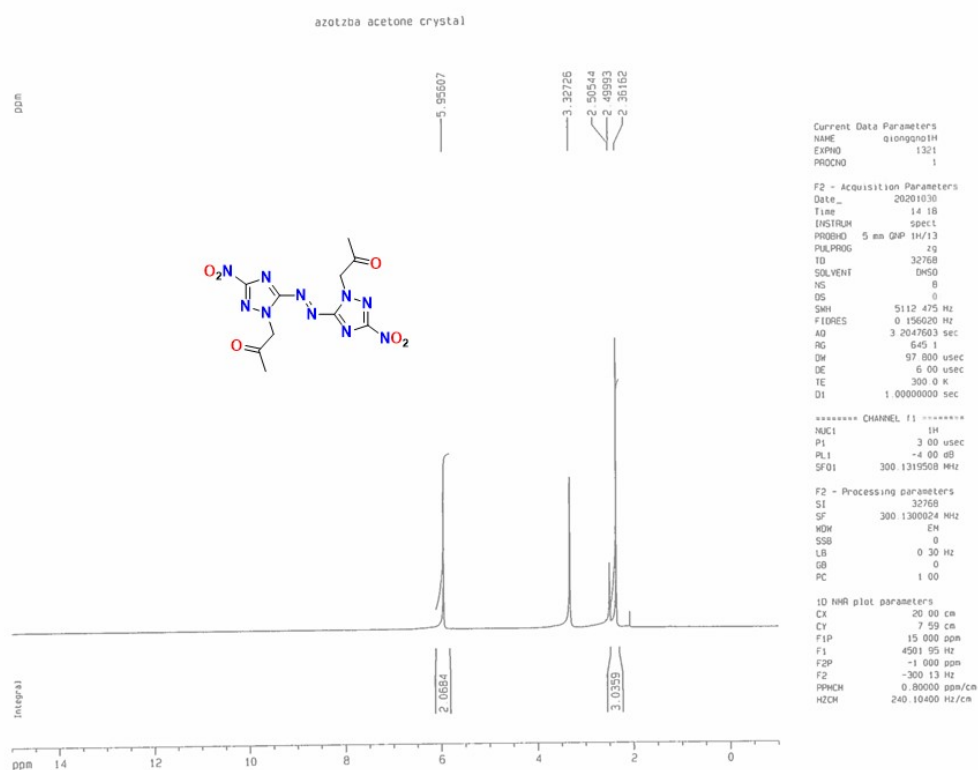

Figure S2  $^1\text{H}$ -NMR spectrum of **2** in  $d_6$ -DMSO.

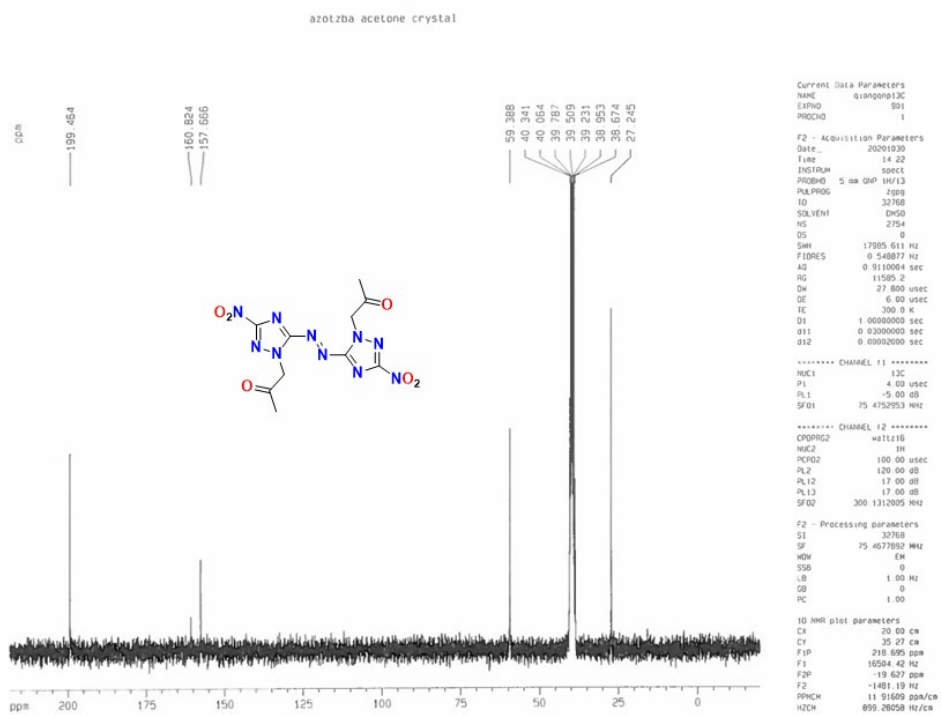

Figure S3 <sup>13</sup>C-NMR spectrum of **2** in *d*<sub>6</sub>-DMSO.

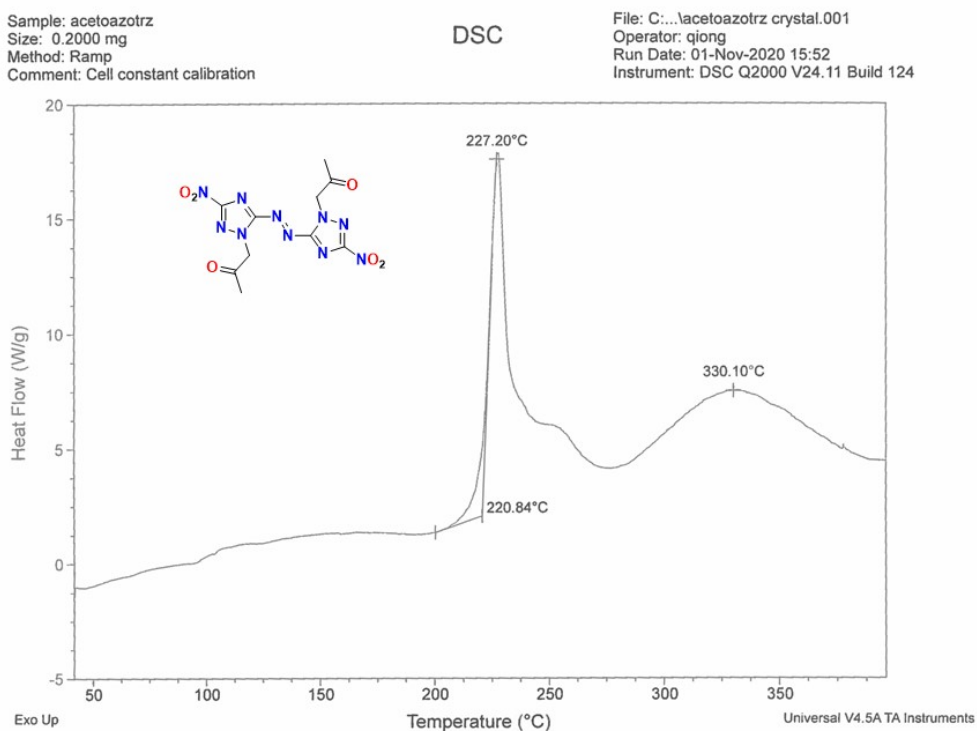

Figure S4 DSC plot of **2**.



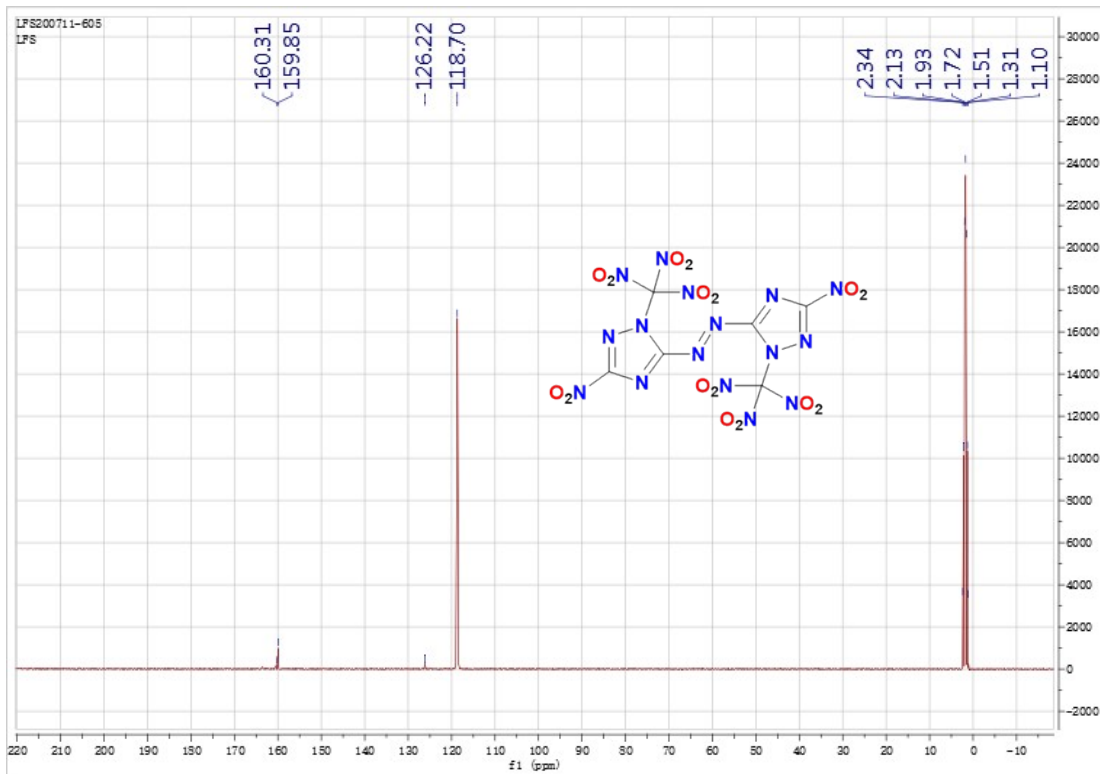

**Figure S5**  $^{13}\text{C}$ -NMR spectrum of **3** in  $\text{CD}_3\text{CN}$ .

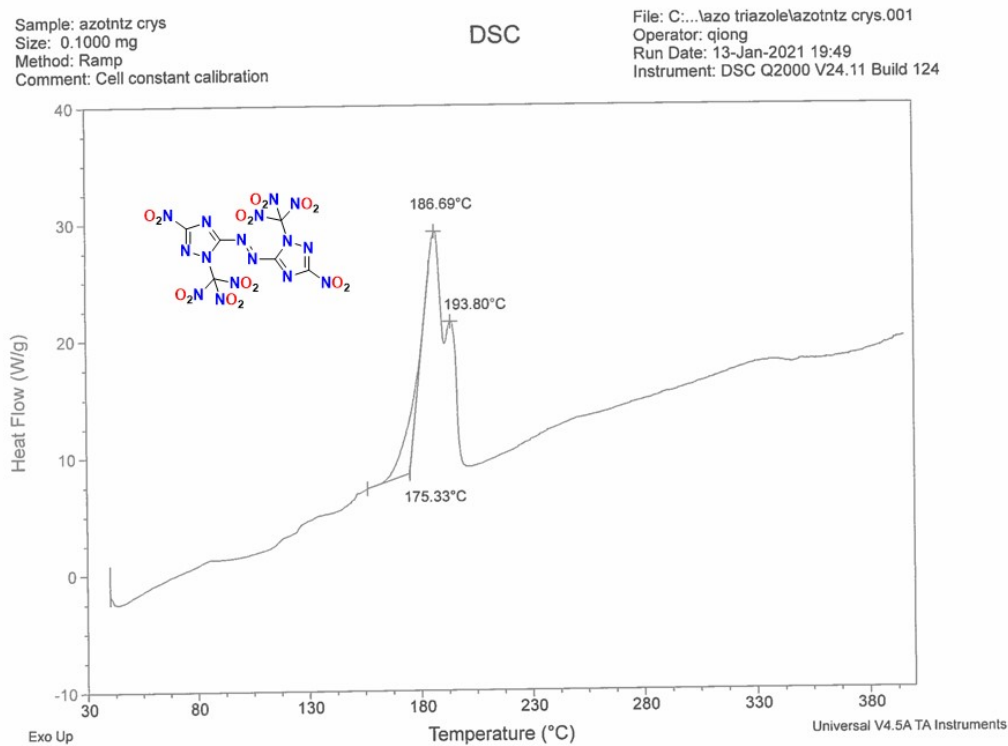

**Figure S6** DSC plot of **3**.

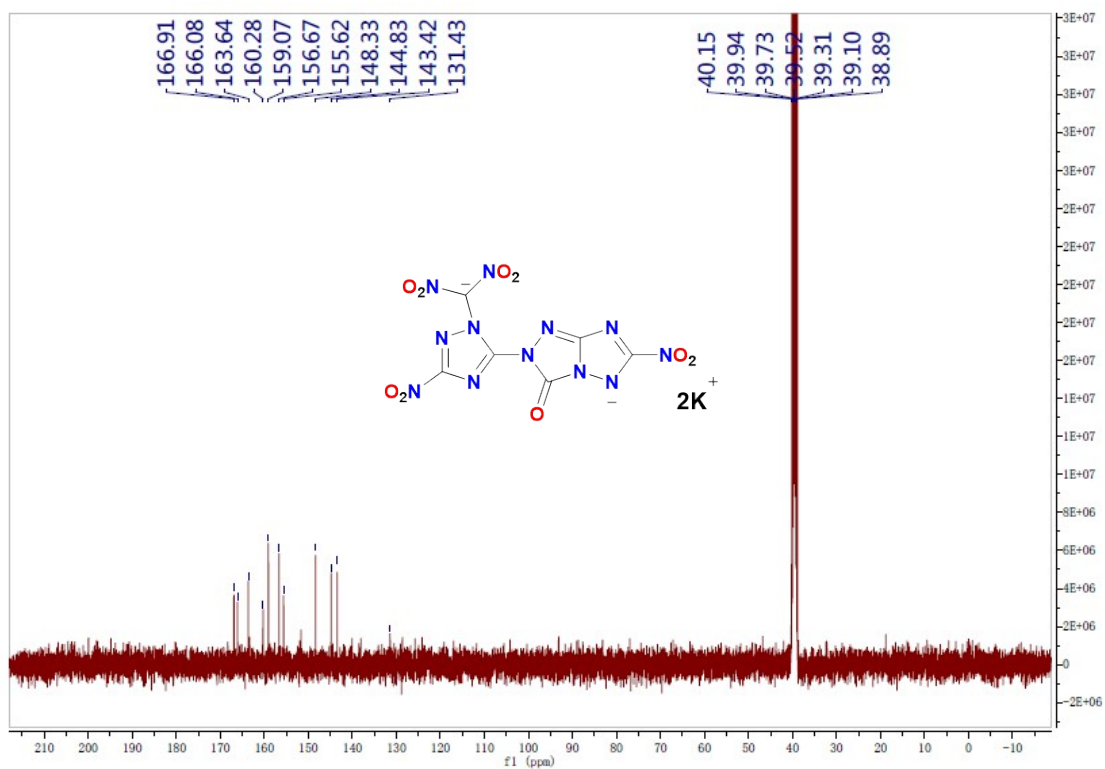

Figure S7  $^{13}\text{C}$ -NMR spectrum of 4 in  $d_6$ -DMSO.

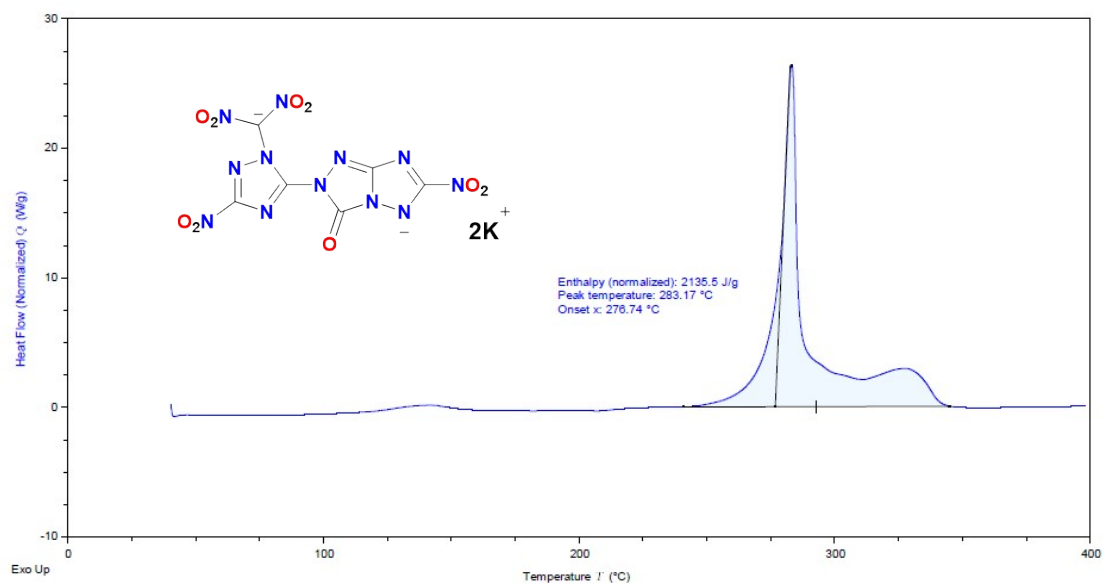

Figure S8 DSC plot of 4.

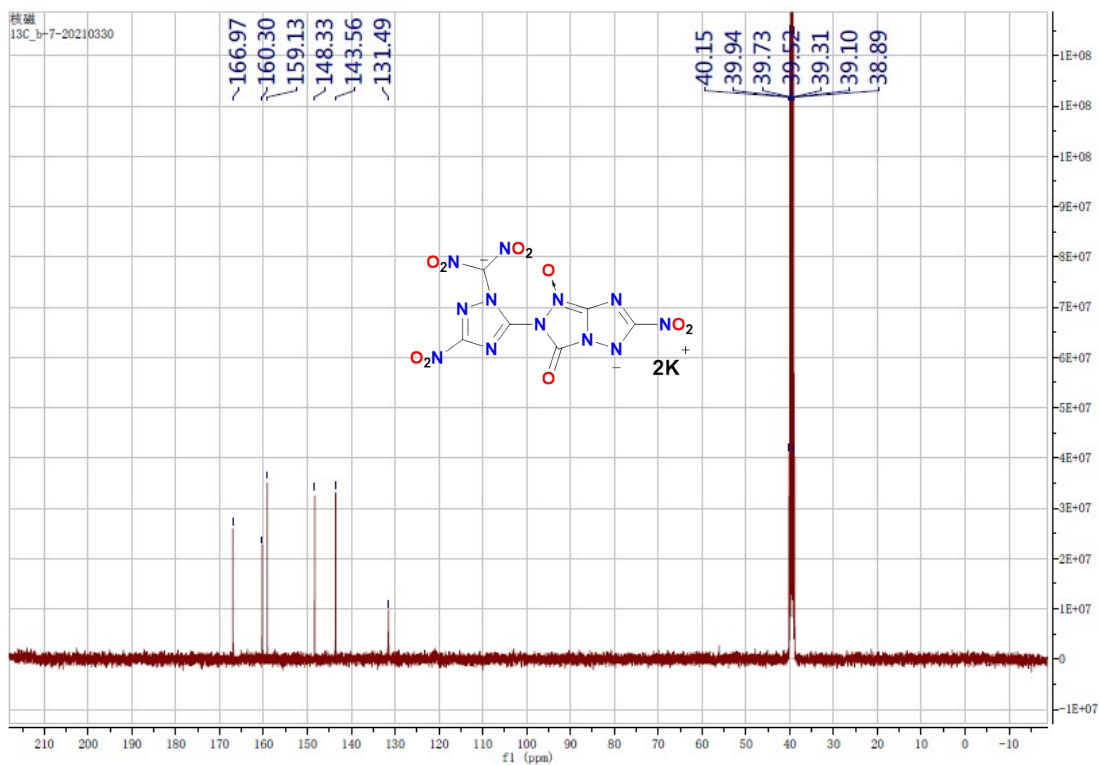

Figure S9  $^{13}\text{C}$ -NMR spectrum of **5** in  $d_6$ -DMSO.

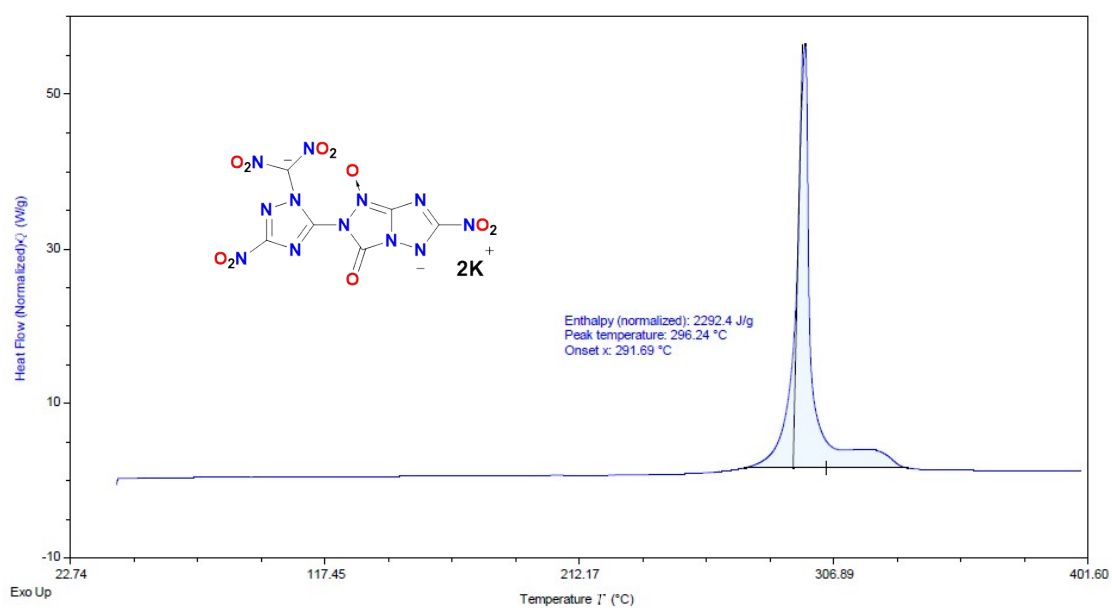

Figure S10 DSC plot of **5**.

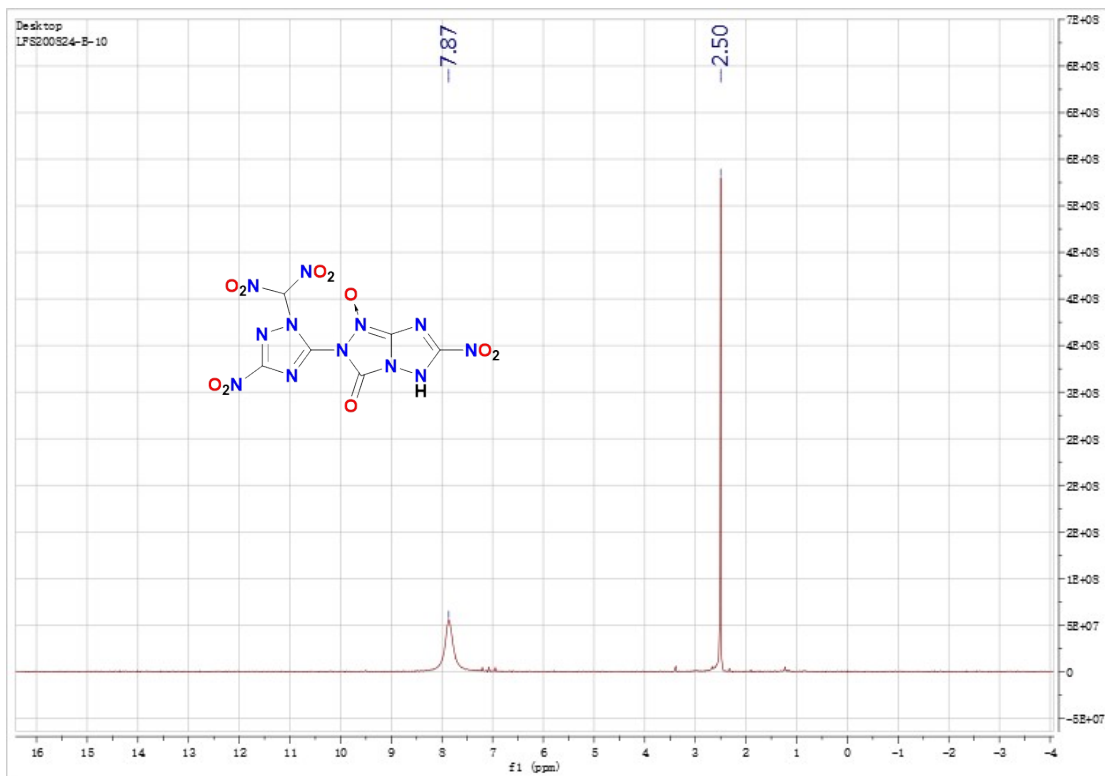

Figure S11  $^1\text{H}$  NMR spectrum of 7 in  $d_6$ -DMSO.

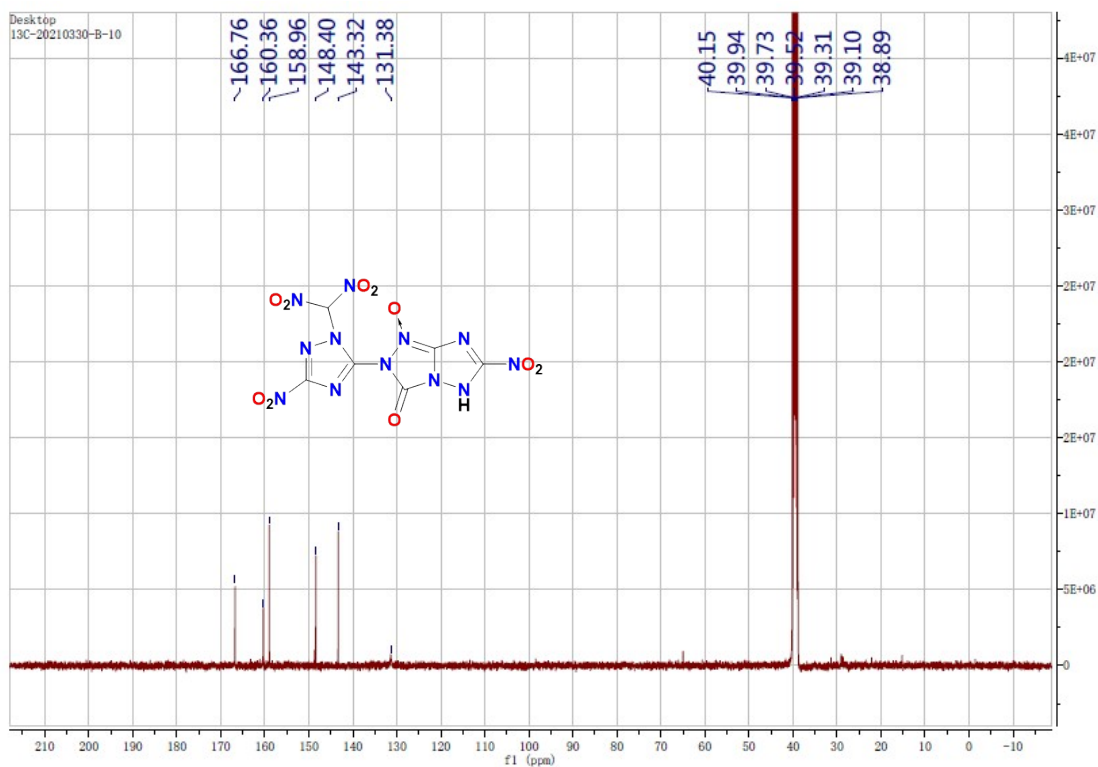

Figure S12  $^{13}\text{C}$  NMR spectrum of 7 in  $d_6$ -DMSO.

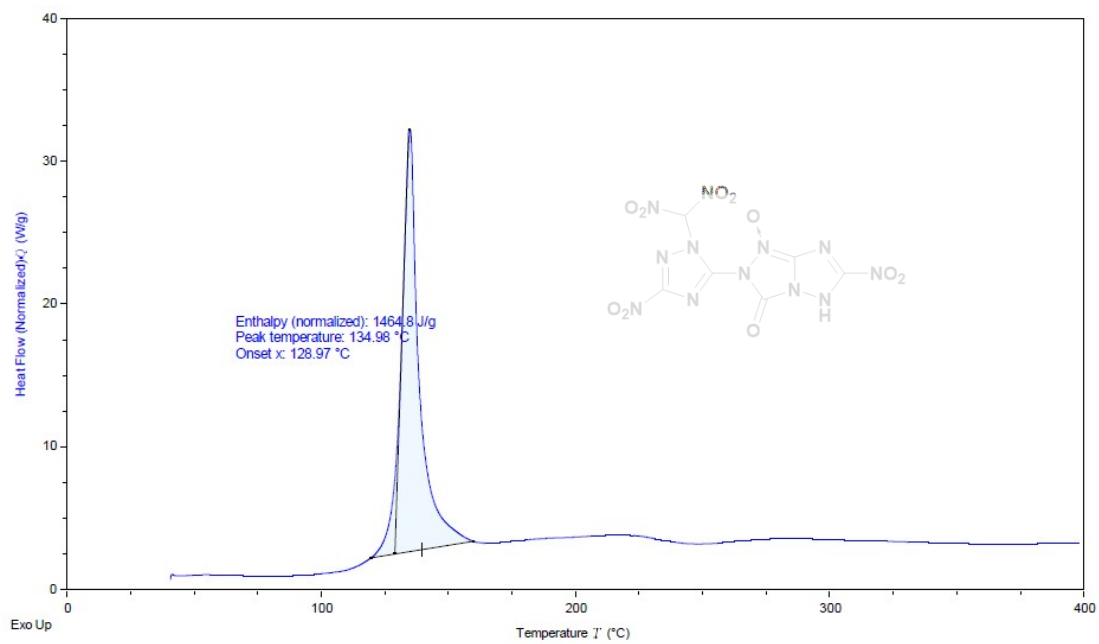

Figure S13 DSC plot of 7.

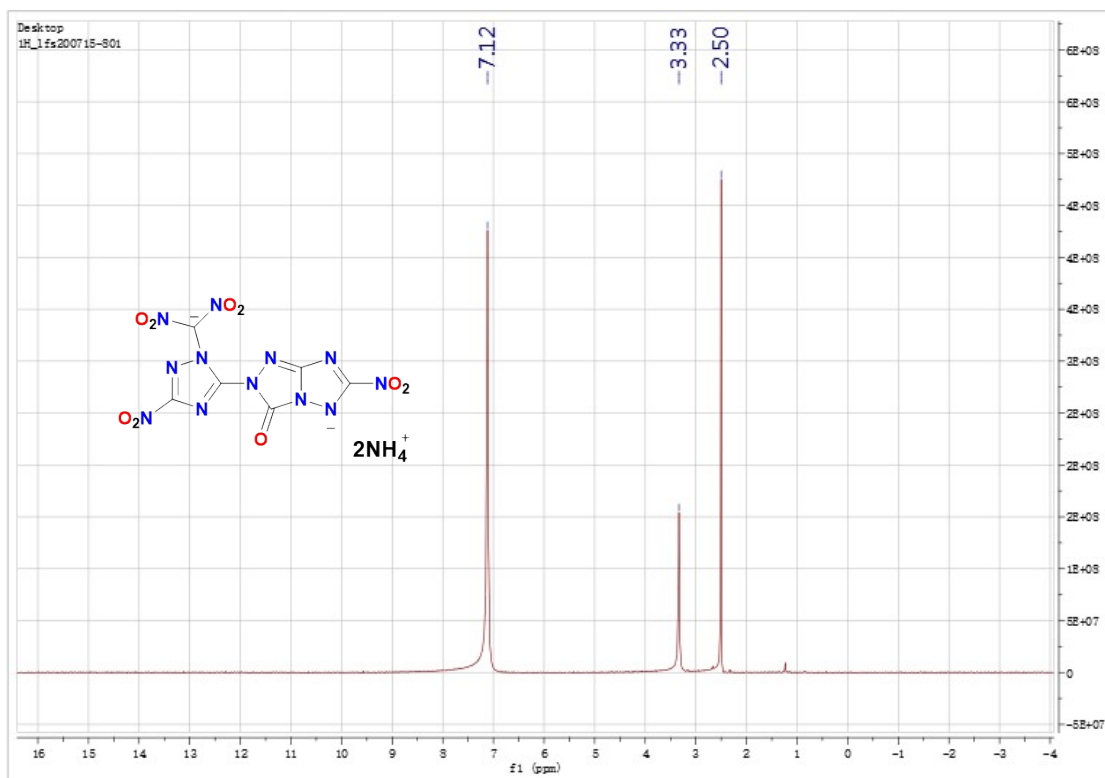

Figure S14 <sup>1</sup>H NMR spectrum of 8 in d<sub>6</sub>-DMSO.

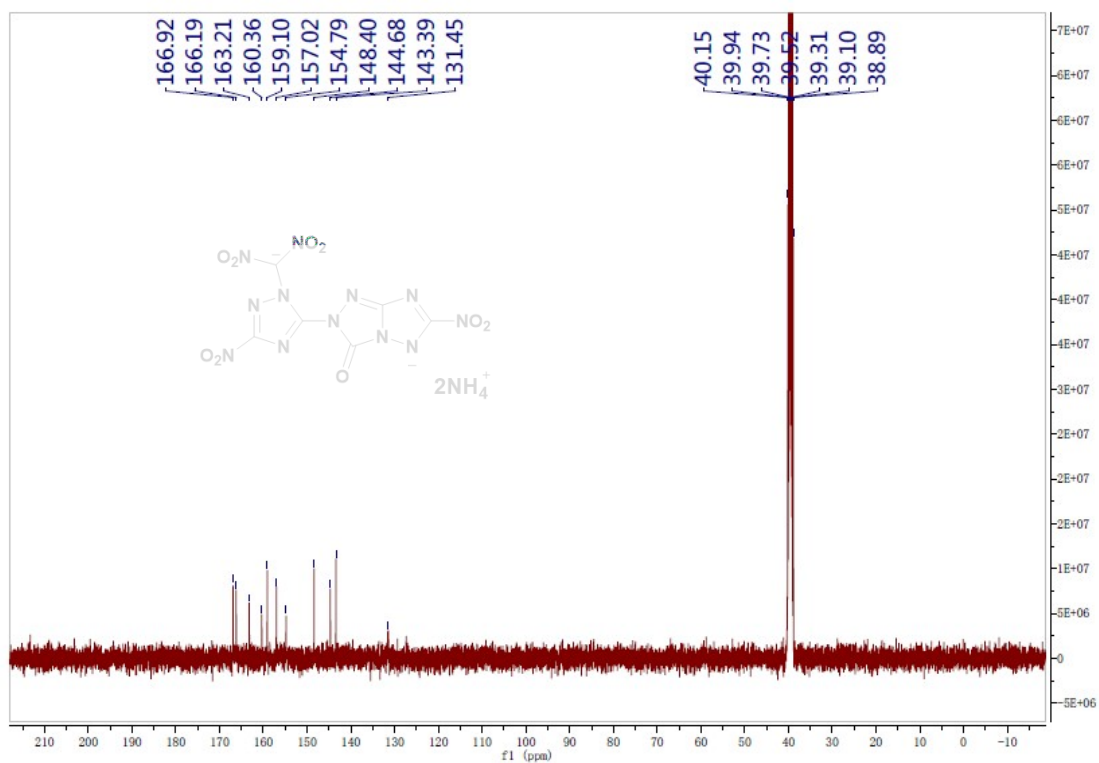

**Figure S15**  $^{13}\text{C}$  NMR spectrum of **8** in  $d_6\text{-DMSO}$ .

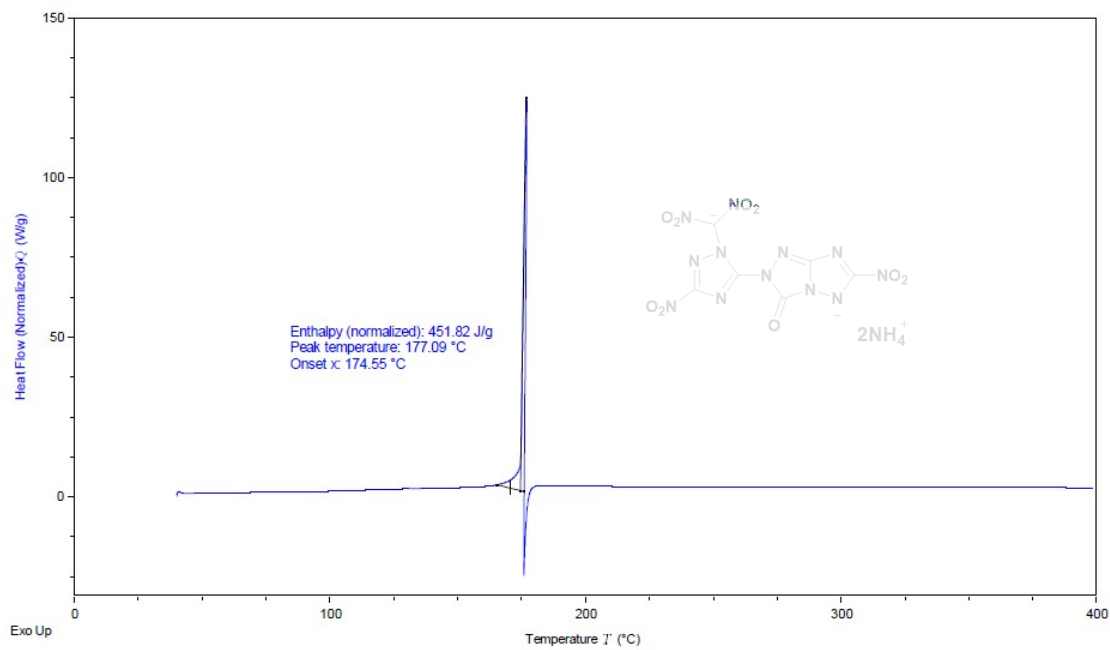

**Figure S16** DSC plot of **8**.

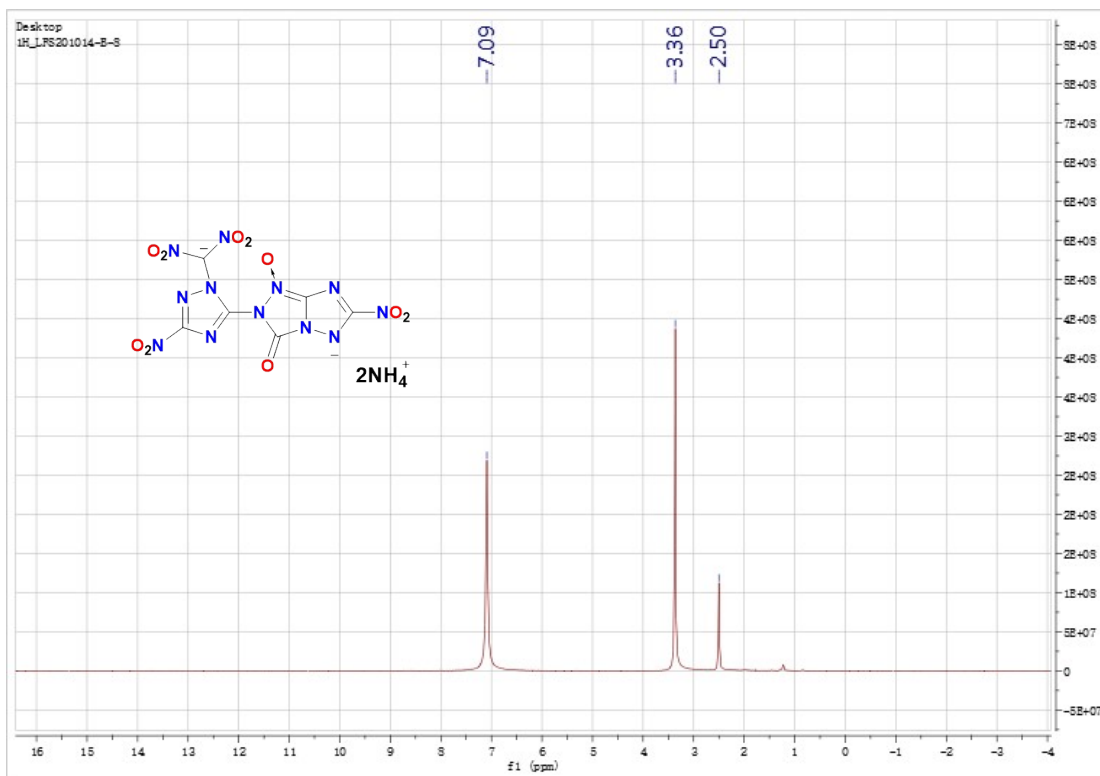

Figure S17  $^1\text{H}$  NMR spectrum of **9** in  $d_6$ -DMSO.

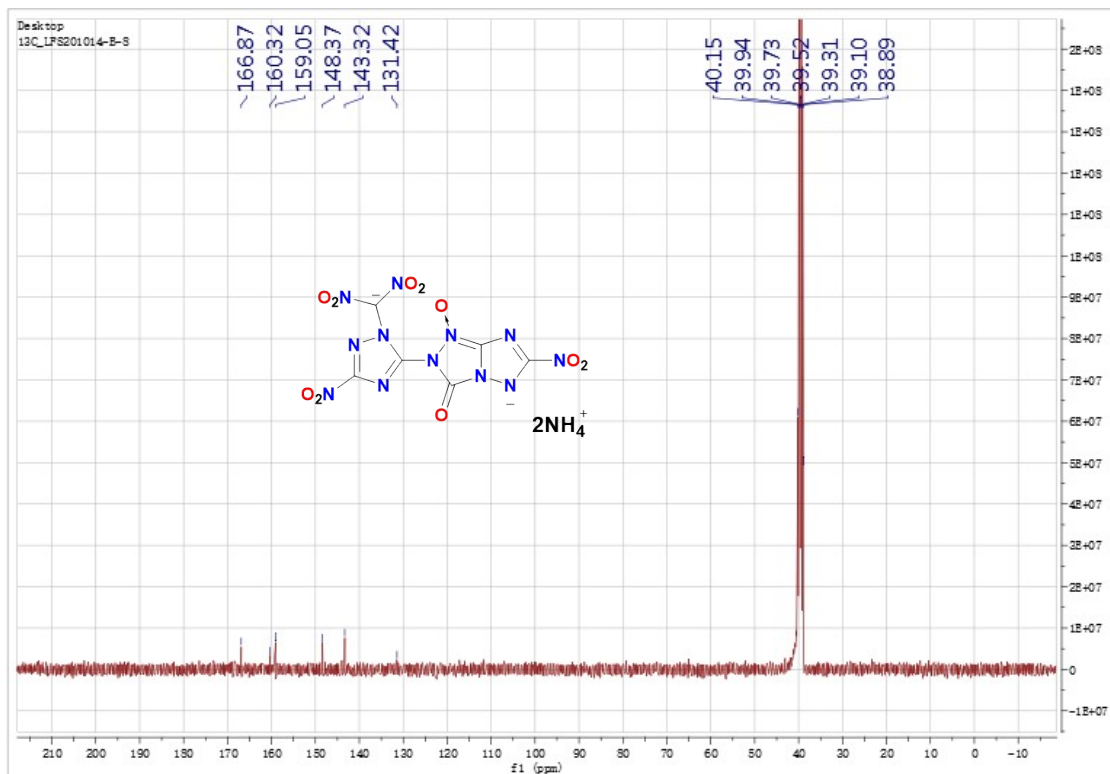

Figure S18  $^{13}\text{C}$  NMR spectrum of **9** in  $d_6$ -DMSO.

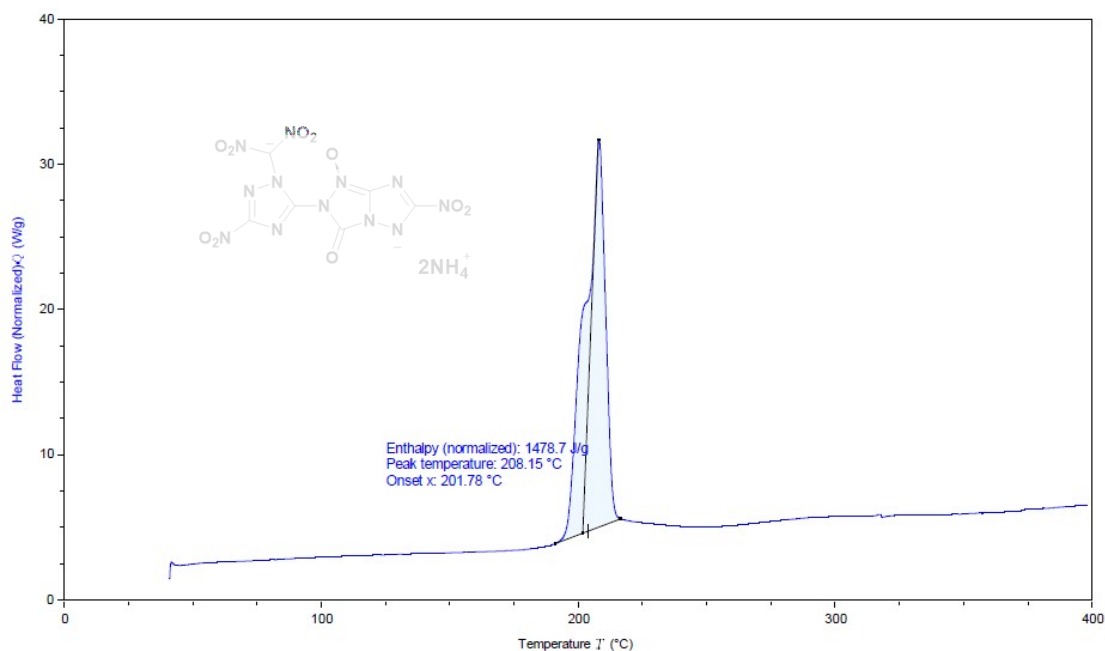

**Figure S19** DSC plot of **9**.

## References

- 1 T. Liu, X. Qi, K. Wang, J. Zhang, W. Zhang and Q. Zhang, *New J. Chem.*, 2017, **41**, 9070-9076.
- 2 M. J. Frisch, G. W. Trucks, H. B. Schlegel, G. E. Scuseria, M. A. Robb, J. R. Cheeseman, G. Scalmani, V. Barone, B. Mennucci, G. A. Petersson, H. Nakatsuji, M. Caricato, X. Li, H. P. Hratchian, A. F. Izmaylov, J. Bloino, G. Zheng, J. L. Sonnenberg, M. Hada, M. Ehara, K. Toyota, R. Fukuda, J. Hasegawa, M. Ishida, T. Nakajima, Y. Honda, O. Kitao, H. Nakai, T. Vreven, J. A. Montgomery, Jr., J. E. Peralta, F. Ogliaro, M. Bearpark, J. J. Heyd, E. Brothers, K. N. Kudin, V. N. Staroverov, T. Keith, R. Kobayashi, J. Normand, K. Raghavachari, A. Rendell, J. C. Burant, S. S. Iyengar, J. Tomasi, M. Cossi, N. Rega, J. M. Millam, M. Klene, J. E. Knox, J. B. Cross, V. Bakken, C. Adamo, J. Jaramillo, R. Gomperts, R. E. Stratmann, O. Yazyev, A. J. Austin, R. Cammi, C. Pomelli, J. W. Ochterski, R. L. Martin, K. Morokuma, V. G. Zakrzewski, G. A. Voth, P. Salvador, J. J. Dannenberg, S. Dapprich, A. D. Daniels, O. Farkas, J. B. Foresman, J. V. Ortiz, J. Cioslowski and D. J. Fox, Gaussian 09, Revision B.01, Gaussian, Inc., Wallingford CT, 2010.
- 3 J. M. Martin, *Chem. Phys. Lett.*, 1996, **259**, 669-678.
- 4 P. J. Linstrom and W. G. Mallard, Eds. NIST Chemistry WebBook, NIST Standard Reference Database, 69, National Institute of Standards and Technology, 2005.
